# Supplementary material
Source: PubMed Central journal article supplement (PMC2274946)

MODELLING DYSREGULATED  $\text{Na}^+$  ABSORPTION IN AIRWAY EPITHELIAL  
CELLS WITH MUCOSAL NYSTATIN TREATMENT

Alessandra Livraghi<sup>1\*</sup>, Marcus Mall<sup>3</sup>, Anthony M. Paradiso<sup>1†</sup>, Richard C. Boucher<sup>1,2</sup>,  
and Carla M. Pedrosa Ribeiro<sup>1,2</sup>

Online Data Supplement

***Supplementary Figure 1. Acute AmphoB challenge causes a  $I_{sc}$  increase similar to that induced by Nys.*** A) Representative Ussing chamber tracing illustrating the  $I_{sc}$  response of naïve HBEs to acute AmphoB challenge. Inset: Bar graph showing average peak response and  $t > 200$  min post-challenge values, mean  $\pm$  SEM,  $n = 7$ . B) Additional images of naïve, KBR- and Nys-treated cultures fixed with  $\text{OsO}_4/\text{PFC}$  and stained with Richardson's staining. Note the cellular debris embedded in the thick layer of mucus at the surface of Nys-treated culture (arrows). Scale bar = 10  $\mu\text{m}$ .

# Suppl. Figure 1

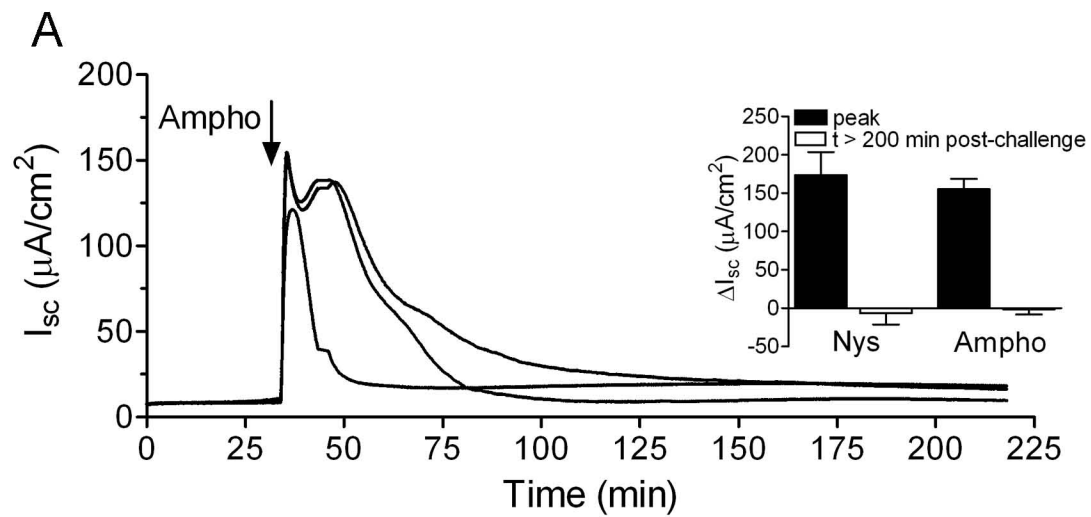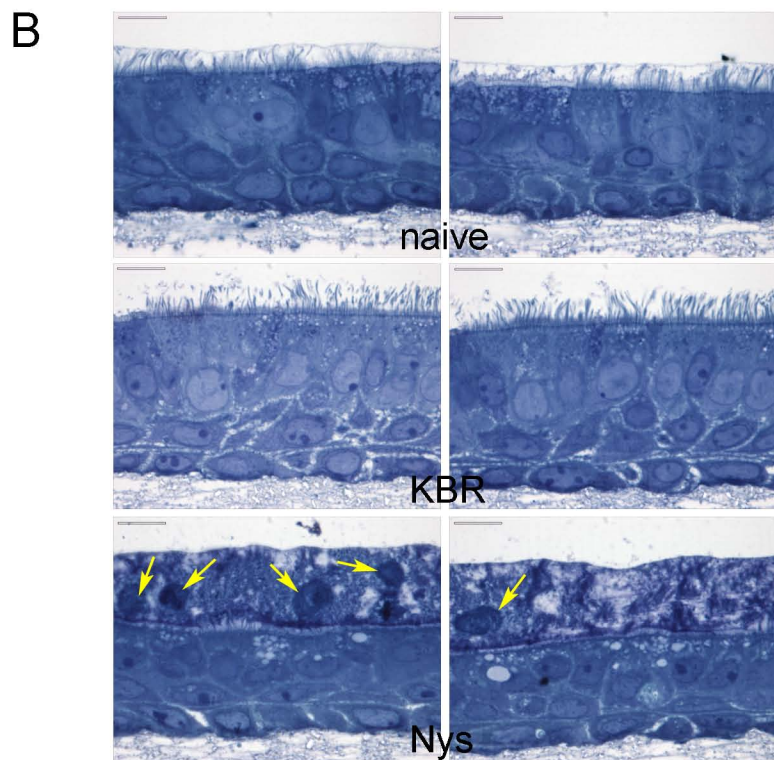

Supplement: ajrcmb_38_4_423__1.pdf [file ajrcmb_38_4_423__1.pdf]
